# Supplementary material
Source: HighWire-hosted journal article supplement (https://erj.ersjournals.com/content/58/6/2004079)
Supplement: inline-supplementary-material-1 [file inline-supplementary-material-1.pdf]

## **ERS Task Force Therapy for Sarcoidosis**

### **Supplement 1 Individual therapies**

The task force made specific recommendations regarding therapy for various manifestations of sarcoidosis. Most of these recommendations involve anti-inflammatory therapies. In general, the dose and duration of therapy is similar for the different manifestations. In those cases where there are differences, these are usually discussed within the individual PICO.

About half of patients with sarcoidosis are treated with one or more anti-inflammatory therapy (1;2). The prolonged dose of these drugs can lead to significant toxicity. Prednisone is the most commonly employed medication for treating sarcoidosis and has been associated with significant morbidity, especially weight gain (3-6). However, other agents may lead to specific toxicity. Table S-1 summarizes the various anti-inflammatory treatments used for sarcoidosis, including their toxicity.

**Table S-1**

**Anti-inflammatory therapies for sarcoidosis**

| Drug                        | Dosage                                              | Major Toxicity                                                                                | Recommended monitoring                               | Comments                                              |
|-----------------------------|-----------------------------------------------------|-----------------------------------------------------------------------------------------------|------------------------------------------------------|-------------------------------------------------------|
| Prednisone/<br>prednisolone | Initial 20 mg qd<br><br>Follow up 5-10 mg qd to qod | Diabetes<br>Hypertension<br>Weight gain<br>Osteoporosis<br>Cataracts<br>Glaucoma<br>Moodiness | Bone density<br><br>Blood pressure and serum glucose | Cumulative toxicity                                   |
| Methotrexate                | 10-15 mg once a week                                | Nausea<br>Leukopenia<br>Hepatotoxicity<br>Pulmonary                                           | CBC, hepatic, renal serum testing                    | Cleared by kidney, avoid in significant renal failure |
| Leflunomide                 | 10-20 mg qd                                         | Nausea<br>Leukopenia<br>Hepatotoxicity<br>Pulmonary                                           | CBC, hepatic, renal serum testing                    | Cleared by kidney, avoid in significant renal failure |
| Azathioprine                | 50-250 mg qd                                        | Nausea<br>Leukopenia<br>Infections<br>Malignancy                                              | CBC                                                  |                                                       |
| Mycophenolate               | 500-1500 mg bid                                     | Diarrhea<br>Leukopenia<br>Infections                                                          | CBC                                                  | Less experience in sarcoidosis than other agents      |

|                                      |                                                               | Malignancy                                               |                                                                                                                                                                                                           |                                                                    |
|--------------------------------------|---------------------------------------------------------------|----------------------------------------------------------|-----------------------------------------------------------------------------------------------------------------------------------------------------------------------------------------------------------|--------------------------------------------------------------------|
| Infliximab or biosimilars *          | 3-5 mg/kg initially, 2 weeks later, than once every 4-6 weeks | Infections<br><br>Allergic reaction                      | Screen for prior tuberculosis<br><br>Monitor for allergic reactions<br><br>Contraindicated in severe CHF, prior malignancy, demyelinating neurologic disease, active tuberculosis, deep fungal infections | Allergic reactions can be life threatening                         |
| Adalimumab *                         | 40 mg every 1-2 weeks                                         | Infections                                               | Screen for prior tuberculosis<br><br>Monitor for allergic reactions<br><br>Contraindicated in severe CHF, prior malignancy, demyelinating neurologic disease, active tuberculosis, deep fungal infections | Less toxic than infliximab                                         |
| Rituximab *                          | 500-1000 mg every 1-6 months                                  | Infections                                               | Screen for viral hepatitis<br><br>Check IgG level with chronic therapy                                                                                                                                    | High risk for viral reactivation<br><br>Can lead to IgG deficiency |
| Repository corticotropin injection * | 40-80 units twice a week                                      | Diabetes<br><br>Hypertension<br><br>Edema<br><br>Anxiety | Monitor glucose and blood pressure                                                                                                                                                                        | Most of toxicity is on day of injection                            |
| Hydroxychloroquine                   | 200-400 mg qd                                                 | Loss of vision                                           | Ocular exams every                                                                                                                                                                                        | Minimal impact                                                     |

|  |  |  |             |                                   |
|--|--|--|-------------|-----------------------------------|
|  |  |  | 6-12 months | on cardiac and neurologic disease |
|--|--|--|-------------|-----------------------------------|

\*Used reserved for patients who have failed prior treatments with steroids and/or anti-metabolites.

CBC: complete blood count; qd: daily; bid: twice a day; IgG; immunoglobulin G;

Adapted from Obi O and Baughman RP.

*Glucocorticoids:* Prednisone and prednisolone are the two most commonly used drugs of this class, although hydrocortisone and dexamethasone have also been used. These drugs were approved for treatment in the 1950s based on reports of the utility of glucocorticoids and adrenal cortisol stimulating hormone (ACTH) (7;8). The dose of prednisone is unclear (9). Initial studies often gave 1 mg per kilogram body weight or an absolute dose of 40 mg a day. In a multi-center observational study, Broos et al observed that the response as assessed by improvement in FVC was not related to the dose of prednisone (5). In a retrospective study of sarcoidosis patients treated for worsening pulmonary symptoms, McKinzie et al found that 20 mg a day was as effective as higher doses in improving FVC (10). In cardiac sarcoidosis, a retrospective analysis found no benefit for giving more than 30 mg a day of prednisone (11). Prolonged prednisone therapy is associated with significant toxicity (12), including weight gain (5;13), diabetes, mood swings, osteoporosis, and cataracts (3). Therefore alternative agents which are steroid sparing have been investigated.

*Methotrexate:* Of the second line agents for pulmonary sarcoidosis, methotrexate has been the most widely studied. Original reports indicated that approximately two thirds of patients were able to reduce or stop prednisone use after six months of therapy (14;15). Subsequent other studies confirmed the effectiveness of methotrexate (16-18). Guidelines regarding dosage and monitoring sarcoidosis patients have been established (19).

*Leflunomide* is similar to methotrexate in action but with a different toxicity profile. It has been reported as effective in sarcoidosis as an alternative to methotrexate (20;21) and in some case has been used in combination with methotrexate (20). It is associated with less nausea and pulmonary toxicity (22). However, it can cause a peripheral neuropathy (23).

*Azathioprine* is a different anti metabolite which has been used to prevent solid organ rejection. It has been reported as effective as steroid sparing agent, although reported effectiveness ranges from 20 to 80% (17;24-26). Overall, azathioprine has more reported adverse events than methotrexate leading to more frequent withdrawal of the drug (17). The major complications are infections, increased gastrointestinal toxicity, and increased risk for myelodysplasia and malignancy (27-29).

*Mycophenolate* is another transplant medication used for sarcoidosis (30;31). It has less toxicity than azathioprine (28;32). However, one still has to monitor for infections. It has been proposed as more effective than other anti-metabolites for neurosarcoidosis (33;34). However, one study found patients were significantly more likely to have mycophenolate stopped over time compared to methotrexate (35).

In the past, cyclophosphamide (CYC) has been used for treating refractory neurosarcoidosis (36;37). Cyclophosphamide is an alkylating agent associated with a variety of toxicities including bone marrow suppression, increased susceptibility to infection, fertility issues, hemorrhagic cystitis, increased risk of malignancy especially bladder cancer, and rarely pulmonary toxicity (38-42). Therefore the clinician should consider less toxic alternative medications whenever possible.

*Anti-tumor necrosis factor (anti-TNF) antibodies:* Infliximab is the most widely studied and used monoclonal antibody used for treatment of sarcoidosis. In a double blind placebo controlled trials, it was

found to be superior to placebo in treating chronic pulmonary sarcoidosis (43;44) and chronic cutaneous sarcoidosis (45). In addition, there have been several large retrospective series reporting its effectiveness in chronic skin (46), neurologic (47;48), and pulmonary manifestations (49;50). Biosimilars seem to have the same response rate as infliximab (51). Guidelines have been established to help identify which patients to treat, dosing, and monitoring (19). A major limitation of infliximab is increased risk for infections, especially tuberculosis (52), and allergic reactions (53).

Adalimumab is associated with less toxicity. However, the reported experience in sarcoidosis is less robust. It was found more effective than placebo in treating chronic cutaneous sarcoidosis (54). For pulmonary disease, there have been some case series reporting the drug was effective in chronic disease (55;56). Many clinicians feel adalimumab is less potent than infliximab in treating sarcoidosis (57). The drug can be an effective alternative when a patient develops a systemic reaction to infliximab (58).

Golimumab is another anti-TNF monoclonal antibody. In a double blind placebo controlled trial, the drug was no better than placebo in treating the disease (59). While this may have been because of the relatively lower anti-TNF dose of the drug, this drug is not recommended for most patients with advanced sarcoidosis. Etanercept, a TNF receptor antagonist, has also been shown to have a lower rate of response than that seen with the anti-TNF antibodies (60;61).

Rituximab was originally developed as a treatment for non Hodgkins lymphoma. Over the past ten years, it has been used increasingly in nonmalignant conditions, including sarcoidosis. Small case series and reports suggest the drug has a role as a third line therapy for advanced pulmonary, eye, neurologic, or cardiac disease (62-65). Current recommendation is to place patients who respond to rituximab on a maintenance regimen (64). The drug is associated with a lower rate of drug withdrawal than anti-TNF agents (66).

Repository corticotropin injection (RCI) was initially approved for sarcoidosis and many other conditions in the early 1950s. Originally it was felt the only mechanism of action was stimulation of the adrenal cortex to release cortisol and the drug was felt to be equivalent of oral glucocorticoids (8;67). Recent studies of non sarcoidosis diseases have suggested that RCI may have other mechanisms of action through alternative melanocortin receptors (68;69). There have been recent reports of the effectiveness of RCI as a steroid sparing agent in advanced sarcoidosis (70;71).

Hydroxychloroquine and chloroquine are antimalarial agents that have been used to treat sarcoidosis for many years (72). These agents have been useful to treat skin manifestations (73;74) and abnormalities of calcium metabolism (75;76). Hydroxychloroquine is the preferred agent at this time because of reduced ocular toxicity. However, it still may lead to significant vision loss and routine screening is recommended with this drug (77).

#### Reference List

- (1) Baughman RP, Judson MA, Teirstein A, Yeager H, Rossman M, Knatterud GL et al. Presenting characteristics as predictors of duration of treatment in sarcoidosis. *QJM* 2006; 99(5):307-315.
- (2) Gottlieb JE, Israel HL, Steiner RM, Triolo J, Patrick H. Outcome in sarcoidosis. The relationship of relapse to corticosteroid therapy. *Chest* 1997; 111(3):623-631.
- (3) Khan NA, Donatelli CV, Tonelli AR, Wiesen J, Ribeiro Neto ML, Sahoo D et al. Toxicity risk from glucocorticoids in sarcoidosis patients. *Respir Med* 2017; 132:9-14. doi: 10.1016/j.rmed.2017.09.003. Epub; %2017 Sep 8.:9-14.
- (4) Judson MA, Chaudhry H, Louis A, Lee K, Yucel R. The effect of corticosteroids on quality of life in a sarcoidosis clinic: the results of a propensity analysis. *Respir Med* 2015; 109(4):526-531.
- (5) Broos CE, Poell LHC, Looman CWN, In 't Veen JCCM, Grootenboers MJJH, Heller R et al. No evidence found for an association between prednisone dose and FVC change in newly-treated pulmonary sarcoidosis. *Respir Med* 2018; 138S:S31-S37. doi: 10.1016/j.rmed.2017.10.022. Epub; %2017 Oct 31.:S31-S37.

- (6) Baughman RP, Iannuzzi MC, Lower EE, Moller DR, Balkissoon R, Winget DB et al. Use of fluticasone for acute symptomatic pulmonary sarcoidosis. *Sarcoidosis Vasc Diffuse Lung Dis* 2002; 19:198-204.
- (7) Sones M, Israel HL, DRATMAN MB, FRANK JH. Effect of cortisone in sarcoidosis. *N Engl J Med* 1951; 244(6):209-213.
- (8) Miller MA, BASS HE. Effect of Acthar-c (ACTH) in sarcoidosis. *Ann Intern Med* 1952; 37(4):776-784.
- (9) Baughman RP, Nunes H, Sweiss NJ, Lower EE. Established and experimental medical therapy of pulmonary sarcoidosis. *Eur Respir J* 2013; 41:1424-1438.
- (10) McKinzie BP, Bullington WM, Mazur JE, Judson MA. Efficacy of short-course, low-dose corticosteroid therapy for acute pulmonary sarcoidosis exacerbations. *Am J Med Sci* 2010; 339(1):1-4.
- (11) Yazaki Y, Isobe M, Hiroe M, Morimoto S, Hiramitsu S, Nakano T et al. Prognostic determinants of long-term survival in Japanese patients with cardiac sarcoidosis treated with prednisone. *Am J Cardiol* 2001; 88(Nov 1):1006-1010.
- (12) Ligon CB, Judson MA. Impact of systemic corticosteroids on healthcare utilization in patients with sarcoidosis. *Am J Med Sci* 2011; 341(3):196-201.
- (13) Baughman RP, Iannuzzi MC, Lower EE, Moller DR, Balkissoon RC, Winget DB et al. Use of fluticasone in acute symptomatic pulmonary sarcoidosis. *Sarcoidosis Vasc Diffuse Lung Dis* 2002; 19(3):198-204.
- (14) Lower EE, Baughman RP. The use of low dose methotrexate in refractory sarcoidosis. *Am J Med Sci* 1990; 299:153-157.
- (15) Lower EE, Baughman RP. Prolonged use of methotrexate for sarcoidosis. *Arch Intern Med* 1995; 155:846-851.
- (16) Baughman RP, Winget DB, Lower EE. Methotrexate is steroid sparing in acute sarcoidosis: results of a double blind, randomized trial. *Sarcoidosis Vasc Diffuse Lung Dis* 2000; 17:60-66.
- (17) Vorselaars AD, Wuyts WA, Vorselaars VM, Zanen P, Deneer VH, Veltkamp M et al. Methotrexate versus azathioprine in second line therapy of sarcoidosis. *Chest* 2013; 144:805-812.
- (18) Fang C, Zhang Q, Wang N, Jung X, Xu Z. Effectiveness and tolerability of methotrexate in pulmonary sarcoidosis: a single center real-world study. *Sarcoidosis Vasc Diffuse Lung Dis* 2019; 36(3):217-227.
- (19) Drent M, Cremers JP, Jansen TL, Baughman RP. Practical eminence and experience-based recommendations for use of TNF-alpha inhibitors in sarcoidosis. *Sarcoidosis Vasc Diffuse Lung Dis* 2014; 31(2):91-107.



- (20) Baughman RP, Lower EE. Leflunomide for chronic sarcoidosis. *Sarcoidosis Vasc Diffuse Lung Dis* 2004; 21:43-48.
- (21) Sahoo DH, Bandyopadhyay D, Xu M, Pearson K, Parambil JG, Lazar CA et al. Effectiveness and safety of leflunomide for pulmonary and extrapulmonary sarcoidosis. *Eur Respir J* 2011; 38:1145-1150.
- (22) Cannon GW, Holden WL, Juhaeri J, Dai W, Scarazzini L, Stang P. Adverse events with disease modifying antirheumatic drugs (DMARD): a cohort study of leflunomide compared with other DMARD. *J Rheumatol* 2004; 31(10):1906-1911.
- (23) Bonnel RA, Graham DJ. Peripheral neuropathy in patients treated with leflunomide. *Clin Pharmacol Ther* 2004; 75(6):580-585.
- (24) Pacheco Y, Marechal C, Marechal F, Biot N, Perrin-Fayolle M. Azathioprine treatment of chronic pulmonary sarcoidosis. *Sarcoidosis* 1985; 2:107-113.
- (25) Muller-Quernheim J, Kienast K, Held M, Pfeifer S, Costabel U. Treatment of chronic sarcoidosis with an azathioprine/prednisolone regimen. *Eur Respir J* 1999; 14:1117-1122.
- (26) Lewis SJ, Ainslie GM, Bateman ED. Efficacy of azathioprine as second-line treatment in pulmonary sarcoidosis. *Sarcoidosis Vasc Diffuse Lung Dis* 1999; 16:87-92.
- (27) Ertz-Archambault N, Kosiorek H, Taylor GE, Kelemen K, Dueck A, Castro J et al. Association of Therapy for Autoimmune Disease With Myelodysplastic Syndromes and Acute Myeloid Leukemia. *JAMA Oncol* 2017; 3(7):936-943.
- (28) Ramiro S, Gaujoux-Viala C, Nam JL, Smolen JS, Buch M, Gossec L et al. Safety of synthetic and biological DMARDs: a systematic literature review informing the 2013 update of the EULAR recommendations for management of rheumatoid arthritis. *Ann Rheum Dis* 2014; 73(3):529-535.
- (29) Galor A, Jabs DA, Leder HA, Kedhar SR, Dunn JP, Peters GB, III et al. Comparison of antimetabolite drugs as corticosteroid-sparing therapy for noninfectious ocular inflammation. *Ophthalmology* 2008; 115(10):1826-1832.
- (30) Brill AK, Ott SR, Geiser T. Effect and Safety of Mycophenolate Mofetil in Chronic Pulmonary Sarcoidosis: A Retrospective Study. *Respiration* 2013; 86:376-383.
- (31) Hamzeh N, Voelker A, Forssen A, Gottschall EB, Rose C, Mroz P et al. Efficacy of mycophenolate mofetil in sarcoidosis. *Respir Med* 2014; 108:1663-1669.
- (32) Almeida CC, Silveira MR, de Araujo VE, de Lemos LL, de Oliveira CJ, Reis CA et al. Safety of immunosuppressive drugs used as maintenance therapy in kidney transplantation: a systematic review and meta-analysis. *Pharmaceuticals (Basel)* 2013; 6(10):1170-1194.
- (33) Moravan M, Segal BM. Treatment of CNS sarcoidosis with infliximab and mycophenolate mofetil. *Neurology* 2009; 72(4):337-340.

- (34) Androdias G, Maillet D, Marignier R, Pinede L, Confavreux C, Broussolle C et al. Mycophenolate mofetil may be effective in CNS sarcoidosis but not in sarcoid myopathy. *Neurology* 2011; 76(13):1168-1172.
- (35) Bitoun S, Bouvry D, Borie R, Mahevas M, Sacre K, Haroche J et al. Treatment of neurosarcoidosis: A comparative study of methotrexate and mycophenolate mofetil. *Neurology* 2016; 87(24):2517-2521.
- (36) Lower EE, Broderick JP, Brott TG, Baughman RP. Diagnosis and management of neurologic sarcoidosis. *Arch Intern Med* 1997; 157:1864-1868.
- (37) Doty JD, Mazur JE, Judson MA. Treatment of corticosteroid-resistant neurosarcoidosis with a short-course cyclophosphamide regimen. *Chest* 2003; 124(5):2023-2026.
- (38) de Jonge ME, Huitema AD, Rodenhuis S, Beijnen JH. Clinical pharmacokinetics of cyclophosphamide. *Clin Pharmacokinet* 2005; 44(11):1135-1164.
- (39) Talar-Williams C, Hijazi YM, Walther MM, Linehan WM, Hallahan CW, Lubensky I et al. Cyclophosphamide-induced cystitis and bladder cancer in patients with Wegener granulomatosis. *Ann Intern Med* 1996; 124:477-484.
- (40) Qiu TT, Zhang C, Zhao HW, Zhou JW. Calcineurin inhibitors versus cyclophosphamide for idiopathic membranous nephropathy: A systematic review and meta-analysis of 21 clinical trials. *Autoimmun Rev* 2017; 16(2):136-145.
- (41) Lower EE, Blau R, Gazder P, Tummala R. The risk of premature menopause induced by chemotherapy for early breast cancer. *J Womens Health Gend Based Med* 1999; 8(7):949-954.
- (42) Malik SW, Myers JL, DeRemee RA, Specks U. Lung toxicity associated with cyclophosphamide use. Two distinct patterns. *Am J Respir Crit Care Med* 1996; 154(6 Pt 1):1851-1856.
- (43) Baughman RP, Drent M, Kavuru M, Judson MA, Costabel U, Du BR et al. Infliximab therapy in patients with chronic sarcoidosis and pulmonary involvement. *Am J Respir Crit Care Med* 2006; 174(7):795-802.
- (44) Rossman MD, Newman LS, Baughman RP, Teirstein A, Weinberger SE, Miller WJ et al. A double-blind, randomized, placebo-controlled trial of infliximab in patients with active pulmonary sarcoidosis. *Sarcoidosis Vasc Diffuse Lung Dis* 2006; 23:201-208.
- (45) Baughman RP, Judson MA, Lower EE, Drent M, Costabel U, Flavin S et al. Infliximab for chronic cutaneous sarcoidosis: a subset analysis from a double-blind randomized clinical trial. *Sarcoidosis Vasc Diffuse Lung Dis* 2016; 32(4):289-295.
- (46) Stagaki E, Mountford WK, Lackland DT, Judson MA. The treatment of lupus pernio: results of 116 treatment courses in 54 patients. *Chest* 2009; 135(2):468-476.
- (47) Gelfand JM, Bradshaw MJ, Stern BJ, Clifford DB, Wang Y, Cho TA et al. Infliximab for the treatment of CNS sarcoidosis: A multi-institutional series. *Neurology* 2017; 89(20):2092-2100.

- (48) Cohen AF, Bouvry D, Galanaud D, Dehais C, Mathey G, Psimaras D et al. Long-term outcomes of refractory neurosarcoidosis treated with infliximab. *J Neurol* 2017; 264(5):891-897.
- (49) Jamilloux Y, Cohen-Aubart F, Chapelon-Abric C, Maucourt-Boulch D, Marquet A, Perard L et al. Efficacy and safety of tumor necrosis factor antagonists in refractory sarcoidosis: A multicenter study of 132 patients. *Semin Arthritis Rheum* 2017; 47(2):288-294.
- (50) Vorselaars AD, Crommelin HA, Deneer VH, Meek B, Claessen AM, Keijsers RG et al. Effectiveness of infliximab in refractory FDG PET positive sarcoidosis. *Eur Respir J* 2015; 46:175-185.
- (51) Schimmelpennink MC, Vorselaars ADM, van Beek FT, Crommelin HA, Deneer VHM, Keijsers RGM et al. Efficacy and safety of infliximab biosimilar Inflectra((R)) in severe sarcoidosis. *Respir Med* 2018; 138S:S7-S13. doi: 10.1016/j.rmed.2018.02.009. Epub; %2018 Feb; %19.:S7-S13.
- (52) Keane J, Gershon S, Wise RP, Mirabile-Leven E, Kasenica J, Schwieterman WD et al. Tuberculosis associated with infliximab, a tumor necrosis factor-alpha neutralizing agent. *N Engl J Med* 2001; 345:1098-1104.
- (53) Schoels M, Aletaha D, Smolen JS, Wong JB. Comparative effectiveness and safety of biological treatment options after tumour necrosis factor alpha inhibitor failure in rheumatoid arthritis: systematic review and indirect pairwise meta-analysis. *Ann Rheum Dis* 2012.
- (54) Pariser RJ, Paul J, Hirano S, Torosky C, Smith M. A double-blind, randomized, placebo-controlled trial of adalimumab in the treatment of cutaneous sarcoidosis. *J Am Acad Dermatol* 2013; 68(5):765-773.
- (55) Minnis PA, Poland M, Keane MP, Donnelly SC. Adalimumab for refractory pulmonary sarcoidosis. *Ir J Med Sci* 2016; 185(4):969-971.
- (56) Sweiss NJ, Noth I, Mirsaeidi M, Zhang W, Naureckas ET, Hogarth DK et al. Efficacy Results of a 52-week Trial of Adalimumab in the Treatment of Refractory Sarcoidosis. *Sarcoidosis Vasc Diffuse Lung Dis* 2014; 31(1):46-54.
- (57) Baughman RP. Tumor necrosis factor inhibition in treating sarcoidosis: the American experience. *Revista Portuguesa de Pneumologia* 2007; 13:S47-S50.
- (58) Crommelin HA, van der Burg LM, Vorselaars AD, Drent M, Van Moorsel CH, Rijkers GT et al. Efficacy of adalimumab in sarcoidosis patients who developed intolerance to infliximab. *Respir Med* 2016; 115:72-77.
- (59) Judson MA, Baughman RP, Costabel U, Drent M, Gibson KF, Raghu G et al. Safety and efficacy of ustekinumab or golimumab in patients with chronic sarcoidosis. *Eur Respir J* 2014; 44:1296-1307.
- (60) Baughman RP, Lower EE, Bradley DA, Raymond LA, Kaufman A. Etanercept for refractory ocular sarcoidosis: results of a double-blind randomized trial. *Chest* 2005; 128(2):1062-1067.
- (61) Utz JP, Limper AH, Kalra S, Specks U, Scott JP, Vuk-Pavlovic Z et al. Etanercept for the treatment of stage II and III progressive pulmonary sarcoidosis. *Chest* 2003; 124(1):177-185.

- (62) Zella S, Kneiphof J, Haghikia A, Gold R, Voitalla D, Thone J. Successful therapy with rituximab in three patients with probable neurosarcoidosis. *Ther Adv Neurol Disord* 2018; 11:1756286418805732. doi: 10.1177/1756286418805732. eCollection;2018.:1756286418805732.
- (63) Krause ML, Cooper LT, Chareonthaitawee P, Amin S. Successful use of rituximab in refractory cardiac sarcoidosis. *Rheumatology (Oxford)* 2015;kev309.
- (64) Lower EE, Baughman RP, Kaufman AH. Rituximab for refractory granulomatous eye disease. *Clin Ophthalmol* 2012; 6:1613-1618.
- (65) Sweiss NJ, Lower EE, Mirsaeidi M, Dudek S, Garcia JG, Perkins D et al. Rituximab in the treatment of refractory pulmonary sarcoidosis. *Eur Respir J* 2014; 43(5):1525-1528.
- (66) Lower EE, Sturdivant M, Grate L, Baughman RP. Use of third-line therapies in advanced sarcoidosis. *Clin Exp Rheumatol* 2019;14410.
- (67) SALOMON A, APPEL B, COLLINS SF, HERSCHFUS JA, SEGAL MS. Sarcoidosis: pulmonary and skin studies before and after ACTH and cortisone therapy. *Dis Chest* 1956; 29(3):277-291.
- (68) Gong R. The renaissance of corticotropin therapy in proteinuric nephropathies. *Nat Rev Nephrol* 2011; 8(2):122-128.
- (69) Berkovich R, Agius MA. Mechanisms of action of ACTH in the management of relapsing forms of multiple sclerosis. *Ther Adv Neurol Disord* 2014; 7(2):83-96.
- (70) Baughman RP, Barney JB, O'hare L, Lower EE. A retrospective pilot study examining the use of Acthar gel in sarcoidosis patients. *Respir Med* 2016; 110:66-72.
- (71) Baughman RP, Sweiss N, Keijsers R, Birring SS, Shipley R, Saketkoo LA et al. Repository corticotropin for Chronic Pulmonary Sarcoidosis. *Lung* 2017; 195(3):313-322.
- (72) Chloroquine in the treatment of sarcoidosis. A report from the Research Committee of the British Tuberculosis Association. *Tubercle* 1967; 48(4):257-272.
- (73) Jones E, Callen JP. Hydroxychloroquine is effective therapy for control of cutaneous sarcoidal granulomas. *J Am Acad Dermatol* 1990; 23(3 Pt 1):487-489.
- (74) Baughman RP, Lower EE. Evidence-based therapy for cutaneous sarcoidosis. *Clin Dermatol* 2007; 25(3):334-340.
- (75) Adams JS, Diz MM, Sharma OP. Effective reduction in the serum 1,25-dihydroxyvitamin D and calcium concentration in sarcoidosis-associated hypercalcemia with short-course chloroquine therapy. *Ann Intern Med* 1989; 111(5):437-438.
- (76) Baughman RP, Janovcik J, Ray M, Sweiss N, Lower EE. Calcium and vitamin D metabolism in sarcoidosis. *Sarcoidosis Vasc Diffuse Lung Dis* 2013; 30(2):113-120.

- (77) Melles RB, Marmor MF. The Prevalence of Hydroxychloroquine Retinopathy and Toxic Dosing, and the Role of the Ophthalmologist in Reducing Both. *Am J Ophthalmol* 2016; 170:240. doi: 10.1016/j.ajo.2016.06.045. Epub; 2016 Aug 17.:240.
